# Supplementary material for: Timing of oxytocin administration to prevent post-partum hemorrhage in women delivered by cesarean section: A systematic review and metanalysis
Source: PLOS journal article supplement (doi:10.1371/journal.pone.0252491), 2021-06-03
Supplement: S9 (10.1371/journal.pone.0252491.s009) [file journal.pone.0252491.s009]

**S8 Table.** Summary of findings table and GRADE: prophylactic oxytocin administered

after fetal delivery, Before versus After Placental separation at cesarean section

**Summary of findings****Patient or population:** women giving birth by cesarean section**Setting:** hospital**Intervention:** oxytocin given Before Placental Separation**Comparison:** oxytocin given After Placental Separation

| Outcomes                                      | Anticipated absolute effects* (95% CI)              |                                                      | Relative effect (95% CI)          | № of participants (studies) | Certainty of the evidence (GRADE) | Comments                                                                                                          |
|-----------------------------------------------|-----------------------------------------------------|------------------------------------------------------|-----------------------------------|-----------------------------|-----------------------------------|-------------------------------------------------------------------------------------------------------------------|
|                                               | Risk with oxytocin given After Placental Separation | Risk with oxytocin given Before Placental Separation |                                   |                             |                                   |                                                                                                                   |
| Incidence of PPH $\geq 1000$ mL               | 0 per 1.000                                         | <b>0 per 1.000</b><br>(0 to 0)                       | not estimable                     | 100<br>(1 RCT)              | ⊕○○○<br>VERY LOW <sup>a</sup>     | One study [Mangla 2012] reported that no patients in both groups (0/50 versus 0/50) had blood loss $\geq 1000$ mL |
| Need for additional uterotonic                | 0 per 1.000                                         | <b>0 per 1.000</b><br>(0 to 0)                       | not estimable                     | 100<br>(1 RCT)              | ⊕○○○<br>VERY LOW <sup>a</sup>     | One study [Mangla 2012] reported that no patients in both groups (0/50 versus 0/50) needed additional uterotonics |
| Adverse effects of oxytocin - nausea/vomiting | 20 per 1.000                                        | <b>20 per 1.000</b><br>(1 to 311)                    | <b>RR 1.00</b><br>(0.06 to 15.55) | 100<br>(1 RCT)              | ⊕○○○<br>VERY LOW <sup>b</sup>     |                                                                                                                   |

\***The risk in the intervention group** (and its 95% confidence interval) is based on the assumed risk in the comparison group and the **relative effect** of the intervention (and its 95% CI).

CI: Confidence interval; RR: Risk ratio

**GRADE Working Group grades of evidence**

**High certainty:** We are very confident that the true effect lies close to that of the estimate of the effect

**Moderate certainty:** We are moderately confident in the effect estimate: The true effect is likely to be close to the estimate of the effect, but there is a possibility that it is substantially different

**Low certainty:** Our confidence in the effect estimate is limited: The true effect may be substantially different from the estimate of the effect

**Very low certainty:** We have very little confidence in the effect estimate: The true effect is likely to be substantially different from the estimate of effect

**Explanations**

a. Evidence certainty downgraded -1 due to risk of bias (unclear risk for selection bias and selective reporting) and -2 due to very serious imprecision (lack of events)

b. Evidence certainty downgraded -1 due to risk of bias (lack of blinding of participants-subjective outcome, unclear risk for selection bias and selective reporting) and -2 due to very serious imprecision (very small number of events, and wide 95% CI crossing the line of no effect).
